# Supplementary material
Source: Springer Nature journal article supplement (https://www.springermedizin.de/resource/supplementary/13054_2009_8591_MOESM3_ESM.pdf/9732324)
Supplement: MOESM3 [file 9732324]

← Steroids beneficial | Steroids harmful →

High dose studies

Odds ratio (95% CrI)

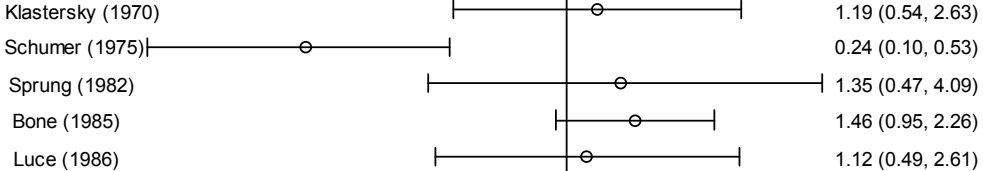

Overall ( $\tau = 1.00$ )

0.91 (0.31, 2.69)

Low dose studies

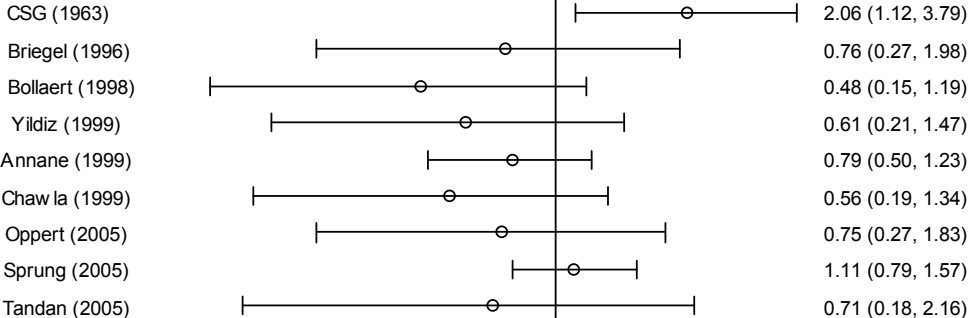

Overall ( $\tau = 0.65$ )

0.80 (0.40, 1.39)

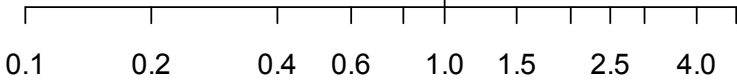

Odds of Mortality - Steroids versus control
